# Supplementary material for: Growth, patterning and alignment of organolead iodide perovskite nanowires for optoelectronic devices
Source: Royal Society of Chemistry journal article supplement (doi:10.1039/c4nr06982j), 2015-01-01

**Figure S1** (a) The leakage current for open circuit at a bias voltage of 10 V. (b) The leakage current evolved as the probes connected on the bare glass at a bias voltage of 10 V.

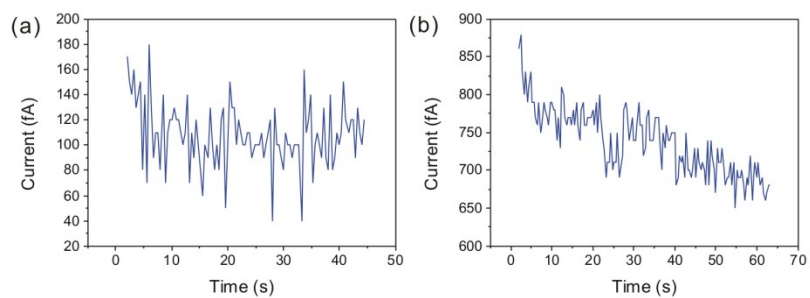

**Figure S2** (a-c) I-t curves of the photodetectors at a bias voltage of 30 V (a), 40 V (b) ,50 V (c) by 650 nm illumination. (d) The curves of Figure S2a-c were plotted in one figure.

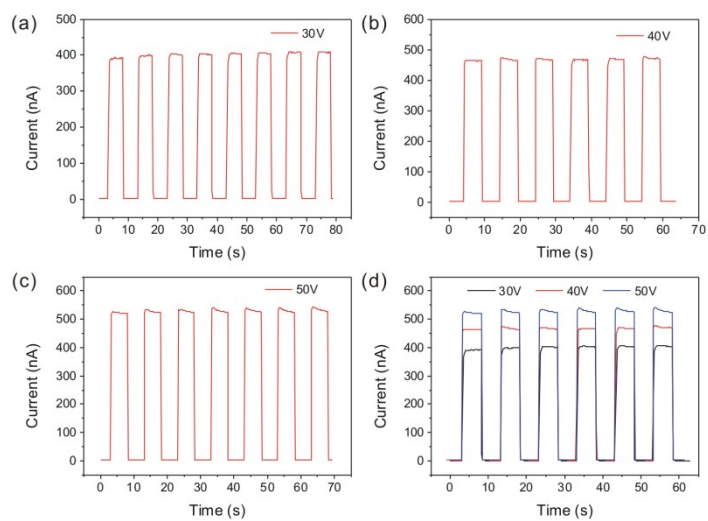

**Figure S3.** The morphologies of NW absorption layer surface.

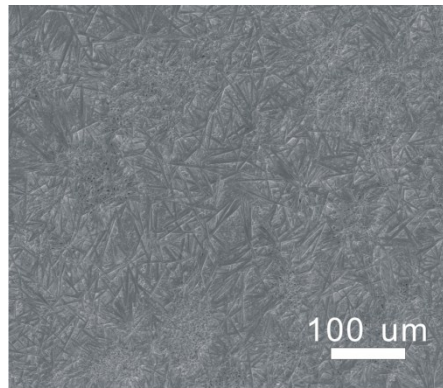

Supplement: c4nr06982j1.pdf [file c4nr06982j1.pdf]
